# Supplementary material
Source: PubMed Central journal article supplement (PMC5938098)
Supplement: NIHMS914912-supplement-supplement_1.pdf [file NIHMS914912-supplement-supplement_1.pdf]

**TABLE E1.** Population characteristics of NHANES 2005-2006\*

| <b>Demographic Characteristics</b>       | <b>Weighted % (SE)<sup>†</sup></b> |
|------------------------------------------|------------------------------------|
| <b>Participant age</b>                   |                                    |
| 1-17                                     | 24.3 (0.7)                         |
| 18+                                      | 75.7 (0.7)                         |
| <b>Gender</b>                            |                                    |
| Female                                   | 51.1 (0.6)                         |
| Male                                     | 48.9 (0.6)                         |
| <b>Race/Ethnicity</b>                    |                                    |
| Other                                    | 10.1 (1.2)                         |
| Mexican American                         | 9.4 (1.2)                          |
| Non-Hispanic White                       | 68.1 (2.7)                         |
| Non-Hispanic Black                       | 12.3 (1.9)                         |
| <b>Family PIR</b>                        |                                    |
| Low (PIR $\leq$ 1.3)                     | 22.0 (1.5)                         |
| Medium (1.3 < PIR $\leq$ 3.5)            | 40.7 (1.3)                         |
| High (PIR > 3.5)                         | 37.3 (2.4)                         |
| <b>Census region</b>                     |                                    |
| Northeast                                | 14.5 (3.2)                         |
| Midwest                                  | 25.3 (7.3)                         |
| South                                    | 29.2 (3.4)                         |
| West                                     | 31.0 (7.6)                         |
| <b>Level of urbanization<sup>‡</sup></b> |                                    |
| Noncore                                  | 6.5 (6.5)                          |
| Micropolitan                             | 14.9 (6.1)                         |
| Medium + small metro                     | 27.9 (10.2)                        |
| Large metro, fringe                      | 16.4 (8.1)                         |
| Large metro, central                     | 34.4 (7.1)                         |

\* Participants with available dust data (N=6963).

<sup>†</sup> Weighted for the multi-stage sampling design of the NHANES.

<sup>‡</sup> The metropolitan counties are subdivided based on the population of their metropolitan statistical area (MSA): large (central, fringe), for MSA population of 1 million or more; medium, for MSA population of 250,000–999,999; and small, for MSA population below 250,000. Non-metropolitan counties not defined as micropolitan are considered to be noncore and are thought of as the most rural areas.

**Table E2.** Distributional characteristics of detectable allergens concentrations ( $\mu\text{g/g}$ ) in NHANES 2005-2006

| Allergen | N     | $\geq$ LLOD (%) | Min   | P25   | P50   | P75    | P90     | Max       | Geo Mean |
|----------|-------|-----------------|-------|-------|-------|--------|---------|-----------|----------|
| Can f 1  | 5,486 | 86.7            | 0.013 | 0.106 | 0.842 | 12.937 | 50.216  | 1,216.406 | 1.130    |
| Fel d 1  | 6,106 | 93.0            | 0.004 | 0.063 | 0.344 | 9.238  | 112.500 | 2,944.677 | 0.775    |
| Der f 1  | 3,911 | 58.2            | 0.013 | 0.047 | 0.210 | 1.116  | 3.671   | 141.466   | 0.258    |
| Der p 1  | 3,655 | 48.9            | 0.013 | 0.045 | 0.226 | 1.309  | 4.963   | 144.801   | 0.284    |
| Alt a 1  | 1,477 | 25.5            | 0.004 | 0.005 | 0.007 | 0.013  | 0.019   | 0.258     | 0.009    |
| Bla g 1* | 2,527 | 33.3            | 0.220 | 0.628 | 1.135 | 1.960  | 3.964   | 272.440   | 1.426    |
| Mus m 1  | 5,772 | 80.9            | 0.002 | 0.008 | 0.023 | 0.080  | 0.299   | 134.387   | 0.029    |
| Rat n 1  | 1,897 | 30.3            | 0.004 | 0.006 | 0.009 | 0.015  | 0.023   | 83.867    | 0.011    |

\*Unit of measurement is (U/g):  
Unit of measurement is ( $\mu\text{g}$ ):

**Table E3.** Odds ratios (OR) with 95% confidence intervals (CI) for bivariate associations between elevated allergen levels (NHANES 2005-2006)\*†

|         | <b><u>Alt a 1</u></b><br>OR (95% CI) | <b><u>Bla g 1</u></b><br>OR (95% CI) | <b><u>Can f 1</u></b><br>OR (95% CI) | <b><u>Der f 1</u></b><br>OR (95% CI) | <b><u>Der p 1</u></b><br>OR (95% CI) | <b><u>Fel d 1</u></b><br>OR (95% CI) | <b><u>Mus m 1</u></b><br>OR (95% CI) | <b><u>Rat n 1</u></b><br>OR (95% CI) |
|---------|--------------------------------------|--------------------------------------|--------------------------------------|--------------------------------------|--------------------------------------|--------------------------------------|--------------------------------------|--------------------------------------|
| Alt a 1 | NA                                   | 1.68 (1.00-2.84)                     | <b>1.39 (1.06-1.82)</b>              | <b>1.51 (1.13-2.01)</b>              | <b>1.48 (1.00-2.18)</b>              | <b>4.34 (3.32-5.68)</b>              | <b>0.55 (0.33-0.92)</b>              | <b>35.7 (19.1-66.5)</b>              |
| Bla g 1 |                                      | NA                                   | <b>0.67 (0.52-0.87)</b>              | 0.97 (0.69-1.37)                     | <b>1.84 (1.33-2.55)</b>              | <b>0.53 (0.37-0.77)</b>              | <b>1.89 (1.18-3.01)</b>              | <b>1.58 (1.09-2.31)</b>              |
| Can f 1 |                                      |                                      | NA                                   | <b>0.66 (0.48-0.90)</b>              | 0.87 (0.63-1.19)                     | <b>2.04 (1.60-2.61)</b>              | 0.81 (0.40-1.64)                     | <b>1.83 (1.19-2.81)</b>              |
| Der f 1 |                                      |                                      |                                      | NA                                   | <b>3.72 (2.57-5.37)</b>              | 1.02 (0.81-1.29)                     | 0.70 (0.45-1.11)                     | <b>1.67 (1.16-2.41)</b>              |
| Der p 1 |                                      |                                      |                                      |                                      | NA                                   | 1.06 (0.78-1.45)                     | 1.22 (0.73-2.04)                     | <b>1.68 (1.20-2.35)</b>              |
| Fel d 1 |                                      |                                      |                                      |                                      |                                      | NA                                   | 0.71 (0.44-1.13)                     | <b>4.16 (3.00-5.77)</b>              |
| Mus m 1 |                                      |                                      |                                      |                                      |                                      |                                      | NA                                   | 1.14 (0.73-1.80)                     |
| Rat n 1 |                                      |                                      |                                      |                                      |                                      |                                      |                                      | NA                                   |

NA, Not applicable

\* Allergen levels were dichotomized (elevated levels: yes vs no) to calculate unadjusted ORs. Can f 1, Fel d 1, Der f 1, and Der p 1 levels were elevated if allergen concentration >75 percentile; Alt a 1, Bla g 1, Mus m 1 and Rat n 1 levels were elevated if allergen concentration > 90 percentile.

† Statistically significant associations ( $P < 0.05$ ) are shown in boldface.

**TABLE E4.** Adjusted odds ratios for independent predictors of elevated allergen levels\*

| Model predictors – Demographic and Housing Characteristics | Can f 1 (N=6613)    |       | Fel d 1 (N=6526)     |       | Der f 1 (N=6369)   |       | Der p 1 (N=6504)  |       |
|------------------------------------------------------------|---------------------|-------|----------------------|-------|--------------------|-------|-------------------|-------|
|                                                            | OR (95% CI)         | P     | OR (95% CI)          | P     | OR (95% CI)        | P     | OR (95% CI)       | P     |
| <b>Participant age</b>                                     |                     |       |                      |       |                    |       |                   | 0.002 |
| 1-17                                                       |                     |       |                      |       |                    |       | 1.28 (1.09-1.49)  |       |
| 18+                                                        |                     |       |                      |       |                    |       | 1.00 (ref)        |       |
| <b>Gender</b>                                              |                     |       |                      | 0.002 |                    |       |                   |       |
| Female                                                     |                     |       | 1.37 (1.13-1.66)     |       |                    |       |                   |       |
| Male                                                       |                     |       | 1.00 (ref)           |       |                    |       |                   |       |
| <b>Race/Ethnicity</b>                                      |                     | <.001 |                      | <.001 |                    | 0.002 |                   |       |
| Other                                                      | 2.38 (1.28-4.44)    |       | 2.25 (1.16-4.37)     |       | 2.36 (1.45-3.82)   |       |                   |       |
| Mexican American                                           | 2.08 (1.16-3.74)    |       | 1.99 (1.13-3.50)     |       | 1.30 (0.81-2.10)   |       |                   |       |
| Non-Hispanic White                                         | 4.31 (2.72-6.83)    |       | 3.15 (2.16-4.61)     |       | 1.29 (0.98-1.69)   |       |                   |       |
| Non-Hispanic Black                                         | 1.00 (ref)          |       | 1.00 (ref)           |       | 1.00 (ref)         |       |                   |       |
| <b>Family PIR</b>                                          |                     |       |                      | <.001 |                    | <.001 |                   | 0.003 |
| Low (PIR ≤ 1.3)                                            |                     |       | 0.60 (0.44-0.81)     |       | 1.16 (0.86-1.58)   |       | 1.67 (1.07-2.61)  |       |
| Medium (1.3 < PIR ≤ 3.5)                                   |                     |       | 0.51 (0.40-0.64)     |       | 1.46 (1.09-1.97)   |       | 1.17 (0.84-1.64)  |       |
| High (PIR > 3.5)                                           |                     |       | 1.00 (ref)           |       | 1.00 (ref)         |       | 1.00 (ref)        |       |
| <b>Census region</b>                                       |                     |       |                      |       |                    | <.001 |                   | 0.013 |
| Northeast                                                  |                     |       |                      |       | 17.41 (6.17-49.16) |       | 3.93 (1.16-13.39) |       |
| Midwest                                                    |                     |       |                      |       | 7.68 (2.70-21.88)  |       | 1.45 (0.63-3.32)  |       |
| South                                                      |                     |       |                      |       | 10.58 (3.82-29.31) |       | 2.95 (1.26-6.89)  |       |
| West                                                       |                     |       |                      |       | 1.00 (ref)         |       | 1.00 (ref)        |       |
| <b>Level of urbanization<sup>†</sup></b>                   |                     | <.001 |                      | <.001 |                    | <.001 |                   | <.001 |
| Noncore                                                    | 0.29 (0.21-0.40)    |       | 2.03 (1.40-2.95)     |       | 2.73 (1.77-4.23)   |       | 3.81 (1.83-7.95)  |       |
| Micropolitan                                               | 0.50 (0.32-0.78)    |       | 1.05 (0.48-2.28)     |       | 1.26 (0.76-2.11)   |       | 2.09 (0.94-4.66)  |       |
| Medium + small metro                                       | 0.98 (0.65-1.48)    |       | 1.13 (0.64-1.98)     |       | 1.34 (0.84-2.13)   |       | 2.00 (0.93-4.27)  |       |
| Large metro, fringe                                        | 0.94 (0.67-1.34)    |       | 1.24 (0.87-1.75)     |       | 0.86 (0.56-1.32)   |       | 0.98 (0.48-2.00)  |       |
| Large metro, central                                       | 1.00 (ref)          |       | 1.00 (ref)           |       | 1.00 (ref)         |       | 1.00 (ref)        |       |
| <b>Type of home</b>                                        |                     |       |                      |       |                    |       |                   | <.001 |
| Mobile home or trailer                                     |                     |       |                      |       |                    |       | 2.93 (1.85-4.64)  |       |
| Single family – detached                                   |                     |       |                      |       |                    |       | 1.59 (1.18-2.13)  |       |
| Multi-family housing                                       |                     |       |                      |       |                    |       | 1.00 (ref)        |       |
| <b>Building year</b>                                       |                     |       |                      |       |                    |       |                   | <.001 |
| Missing                                                    |                     |       |                      |       |                    |       | 2.04 (1.45-2.86)  |       |
| Before 1978                                                |                     |       |                      |       |                    |       | 1.86 (1.31-2.63)  |       |
| 1978-present                                               |                     |       |                      |       |                    |       | 1.00 (ref)        |       |
| <b>Tenure</b>                                              |                     |       |                      |       |                    |       |                   | 0.002 |
| Rented or other arrangement                                |                     |       |                      |       |                    |       | 1.88 (1.25-2.82)  |       |
| Owned or being bought                                      |                     |       |                      |       |                    |       | 1.00 (ref)        |       |
| <b>Residence time</b>                                      |                     |       |                      |       |                    | <.001 |                   | <.001 |
| Up to 2 years                                              |                     |       |                      |       | 0.57 (0.45-0.73)   |       | 0.40 (0.28-0.58)  |       |
| 3-5 years                                                  |                     |       |                      |       | 0.66 (0.42-1.03)   |       | 0.56 (0.39-0.81)  |       |
| 6+ years                                                   |                     |       |                      |       | 1.00 (ref)         |       | 1.00 (ref)        |       |
| <b>Number of people in the household</b>                   |                     | <.001 |                      |       |                    |       |                   |       |
| 1-2                                                        | 3.17 (2.09-4.80)    |       |                      |       |                    |       |                   |       |
| 3-4                                                        | 2.24 (1.48-3.39)    |       |                      |       |                    |       |                   |       |
| 5+                                                         | 1.00 (ref)          |       |                      |       |                    |       |                   |       |
| <b>Presence of cat(s)</b>                                  |                     |       |                      | <.001 |                    |       |                   |       |
| Yes                                                        |                     |       | 94.34 (66.29-134.27) |       |                    |       |                   |       |
| No                                                         |                     |       | 1.00 (ref)           |       |                    |       |                   |       |
| <b>Presence of dog(s)</b>                                  |                     | <.001 |                      |       |                    | <.001 |                   |       |
| Yes                                                        | 59.28 (40.23-87.36) |       |                      |       | 0.68 (0.57-0.80)   |       |                   |       |
| No                                                         | 1.00 (ref)          |       |                      |       | 1.00 (ref)         |       |                   |       |
| <b>Presence of cockroaches</b>                             |                     |       |                      |       |                    |       |                   | 0.023 |
| Yes                                                        |                     |       |                      |       |                    |       | 1.53 (1.06-2.20)  |       |
| No                                                         |                     |       |                      |       |                    |       | 1.00 (ref)        |       |
| <b>Presence of mildew/musty smell</b>                      |                     |       |                      |       |                    |       |                   | 0.012 |
| Yes                                                        |                     |       |                      |       |                    |       | 1.52 (1.10-2.10)  |       |
| No                                                         |                     |       |                      |       |                    |       | 1.00 (ref)        |       |
| <b>Presence of children</b>                                |                     |       |                      |       |                    | 0.035 |                   |       |
| Child aged 1-5                                             |                     |       |                      |       | 0.72 (0.55-0.93)   |       |                   |       |
| Child aged 6-17                                            |                     |       |                      |       | 0.78 (0.55-1.09)   |       |                   |       |
| No children                                                |                     |       |                      |       | 1.00 (ref)         |       |                   |       |
| <b>Removal/avoidance of pets</b>                           |                     |       |                      |       |                    | 0.009 |                   |       |
| Yes                                                        |                     |       |                      |       | 0.63 (0.45-0.89)   |       |                   |       |
| No                                                         |                     |       |                      |       | 1.00 (ref)         |       |                   |       |

TABLE E4. Continued\*

| Model predictors – Demographic and Housing Characteristics | Can f 1 (N=6613) |       | Fel d 1 (N=6526) |   | Der f 1 (N=6369) |       | Der p 1 (N=6504) |       |
|------------------------------------------------------------|------------------|-------|------------------|---|------------------|-------|------------------|-------|
|                                                            | OR (95% CI)      | P     | OR (95% CI)      | P | OR (95% CI)      | P     | OR (95% CI)      | P     |
| <b>Floor covering</b>                                      |                  | 0.032 |                  |   |                  | <.001 |                  |       |
| Carpeting or rug                                           | 1.77 (1.05-2.98) |       |                  |   | 2.49 (1.84-3.39) |       |                  |       |
| Smooth floor                                               | 1.00 (ref)       |       |                  |   | 1.00 (ref)       |       |                  |       |
| <b>Room humidity</b>                                       |                  |       |                  |   |                  |       |                  | 0.003 |
| ≥ 70%                                                      |                  |       |                  |   |                  |       | 2.03 (1.19-3.46) |       |
| 60-69%                                                     |                  |       |                  |   |                  |       | 1.48 (0.87-2.52) |       |
| 50-59%                                                     |                  |       |                  |   |                  |       | 1.41 (0.94-2.11) |       |
| 40-49%                                                     |                  |       |                  |   |                  |       | 1.03 (0.57-1.87) |       |
| < 40%                                                      |                  |       |                  |   |                  |       | 1.00 (ref)       |       |
| <b>Room temperature</b>                                    |                  |       |                  |   |                  |       |                  | 0.009 |
| >82 F                                                      |                  |       |                  |   |                  |       | 0.97 (0.44-2.12) |       |
| 75-82 F                                                    |                  |       |                  |   |                  |       | 1.07 (0.79-1.45) |       |
| < 67 F                                                     |                  |       |                  |   |                  |       | 1.98 (1.28-3.05) |       |
| 67-74 F                                                    |                  |       |                  |   |                  |       | 1.00 (ref)       |       |

| Model predictors – Demographic and Housing Characteristics | Alt a 1 (N=6770) |       | Bla g 1 (N=6768) |       | Mus m 1 (N=6496) |       | Rat n 1 (N=6612) |       |
|------------------------------------------------------------|------------------|-------|------------------|-------|------------------|-------|------------------|-------|
|                                                            | OR (95% CI)      | P     |
| <b>Participant age</b>                                     |                  |       |                  |       |                  | 0.002 |                  |       |
| 1-17                                                       |                  |       |                  |       | 1.44 (1.14-1.82) |       |                  |       |
| 18+                                                        |                  |       |                  |       | 1.00 (ref)       |       |                  |       |
| <b>Gender</b>                                              |                  | 0.047 |                  |       |                  |       |                  |       |
| Female                                                     | 1.27 (1.00-1.62) |       |                  |       |                  |       |                  |       |
| Male                                                       | 1.00 (ref)       |       |                  |       |                  |       |                  |       |
| <b>Race/Ethnicity</b>                                      |                  | <.001 |                  | <.001 |                  |       |                  |       |
| Other                                                      | 2.61 (1.28-5.33) |       | 0.60 (0.32-1.13) |       |                  |       |                  |       |
| Mexican American                                           | 1.37 (0.91-2.04) |       | 0.87 (0.63-1.19) |       |                  |       |                  |       |
| Non-Hispanic White                                         | 3.26 (2.11-5.02) |       | 0.51 (0.37-0.71) |       |                  |       |                  |       |
| Non-Hispanic Black                                         | 1.00 (ref)       |       | 1.00 (ref)       |       |                  |       |                  |       |
| <b>Family PIR</b>                                          |                  |       |                  |       |                  | <.001 |                  |       |
| Low (PIR ≤ 1.3)                                            |                  |       |                  |       | 4.64 (2.82-7.64) |       |                  |       |
| Medium (1.3 < PIR ≤ 3.5)                                   |                  |       |                  |       | 2.75 (1.67-4.53) |       |                  |       |
| High (PIR > 3.5)                                           |                  |       |                  |       | 1.00 (ref)       |       |                  |       |
| <b>Type of home</b>                                        |                  |       |                  |       |                  |       |                  | 0.004 |
| Mobile home or trailer                                     |                  |       |                  |       |                  |       | 1.72 (0.87-3.43) |       |
| Single family - detached                                   |                  |       |                  |       |                  |       | 0.86 (0.56-1.33) |       |
| Multi-family housing                                       |                  |       |                  |       |                  |       | 1.00 (ref)       |       |
| <b>Tenure</b>                                              |                  |       |                  | <.001 |                  |       |                  |       |
| Rented or other arrangement                                |                  |       | 1.57 (1.22-2.02) |       |                  |       |                  |       |
| Owned or being bought                                      |                  |       | 1.00 (ref)       |       |                  |       |                  |       |
| <b>Presence of cat(s)</b>                                  |                  | <.001 |                  |       |                  |       |                  | <.001 |
| Yes                                                        | 2.79 (2.04-3.82) |       |                  |       |                  |       | 3.18 (2.15-4.70) |       |
| No                                                         | 1.00 (ref)       |       |                  |       |                  |       | 1.00 (ref)       |       |
| <b>Presence of dog(s)</b>                                  |                  |       |                  |       |                  |       |                  | 0.011 |
| Yes                                                        |                  |       |                  |       |                  |       | 1.61 (1.12-2.33) |       |
| No                                                         |                  |       |                  |       |                  |       | 1.00 (ref)       |       |
| <b>Presence of cockroaches</b>                             |                  |       |                  | <.001 |                  |       |                  | <.001 |
| Yes                                                        |                  |       | 4.31 (3.03-6.14) |       |                  |       | 2.03 (1.34-3.07) |       |
| No                                                         |                  |       | 1.00 (ref)       |       |                  |       | 1.00 (ref)       |       |
| <b>Presence of mattress cover</b>                          |                  |       |                  |       |                  | 0.046 |                  |       |
| No                                                         |                  |       |                  |       | 1.48 (1.01-2.18) |       |                  |       |
| Yes                                                        |                  |       |                  |       | 1.00 (ref)       |       |                  |       |
| <b>Floor covering</b>                                      |                  |       |                  |       |                  |       |                  | 0.033 |
| Carpeting or rug                                           |                  |       |                  |       |                  |       | 1.68 (1.04-2.70) |       |
| Smooth floor                                               |                  |       |                  |       |                  |       | 1.00 (ref)       |       |

\* Can f 1, Fel d 1, Der f 1, and Der p 1 levels were elevated if allergen concentration >75 percentile; Alt a 1, Bla g 1, Mus m 1 and Rat n 1 levels were elevated if allergen concentration > 90 percentile. Unadjusted prevalences are weighted for the multi-stage sampling design of the NHANES. The Wald statistic was used to test significance of each variable in the model (*P*-value). All odds ratios (OR) are adjusted for each variable in the final prediction model.

† The metropolitan counties are subdivided based on the population of their metropolitan statistical area (MSA): large (central, fringe), for MSA population of 1 million or more; medium, for MSA population of 250,000–999,999; and small, for MSA population below 250,000. Non-metropolitan counties not defined as micropolitan are considered to be noncore and are thought of as the most rural areas.

TABLE E5. Adjusted odds ratios for independent predictors of allergen burden\*

| Model predictors – Demographic and Housing Characteristics | Multiple Elevated Exposures (N=6768) |       | Multiple Detectable Exposures (N=6597) |       | No Elevated Exposures (N=6597) |       | Low Exposure (N=6761) |       |
|------------------------------------------------------------|--------------------------------------|-------|----------------------------------------|-------|--------------------------------|-------|-----------------------|-------|
|                                                            | OR (95% CI)                          | P     | OR (95% CI)                            | P     | OR (95% CI)                    | P     | OR (95% CI)           | P     |
| <b>Participant age</b>                                     |                                      |       |                                        |       |                                | <.001 |                       | <.001 |
| 1-17                                                       |                                      |       |                                        |       | 0.76 (0.65-0.88)               |       | 0.43 (0.34-0.54)      |       |
| 18+                                                        |                                      |       |                                        |       | 1.00 (ref)                     |       | 1.00 (ref)            |       |
| <b>Gender</b>                                              |                                      |       |                                        | 0.030 |                                |       |                       |       |
| Female                                                     |                                      |       | 1.19 (1.02-1.40)                       |       |                                |       |                       |       |
| Male                                                       |                                      |       | 1.00 (ref)                             |       |                                |       |                       |       |
| <b>Race/Ethnicity</b>                                      |                                      |       |                                        | <.001 |                                | 0.007 |                       | <.001 |
| Other                                                      |                                      |       | 2.61 (1.51-4.53)                       |       | 0.62 (0.43-0.90)               |       | 0.50 (0.28-0.86)      |       |
| Mexican American                                           |                                      |       | 1.83 (1.30-2.58)                       |       | 0.55 (0.39-0.77)               |       | 0.42 (0.25-0.71)      |       |
| Non-Hispanic White                                         |                                      |       | 2.48 (1.73-3.55)                       |       | 0.63 (0.43-0.91)               |       | 0.34 (0.26-0.44)      |       |
| Non-Hispanic Black                                         |                                      |       | 1.00 (ref)                             |       | 1.00 (ref)                     |       | 1.00 (ref)            |       |
| <b>Census region</b>                                       |                                      |       |                                        | 0.008 |                                | <.001 |                       | 0.018 |
| Northeast                                                  |                                      |       | 1.72 (0.66-4.47)                       |       | 0.60 (0.34-1.08)               |       | 0.75 (0.32-1.78)      |       |
| Midwest                                                    |                                      |       | 3.07 (1.57-6.01)                       |       | 1.01 (0.76-1.35)               |       | 1.67 (1.05-2.65)      |       |
| South                                                      |                                      |       | 2.49 (1.21-5.14)                       |       | 0.59 (0.44-0.78)               |       | 1.50 (0.92-2.44)      |       |
| West                                                       |                                      |       | 1.00 (ref)                             |       | 1.00 (ref)                     |       | 1.00 (ref)            |       |
| <b>Level of urbanization<sup>†</sup></b>                   |                                      | <.001 |                                        |       |                                | <.001 |                       | <.001 |
| Noncore                                                    | 3.25 (2.16-4.90)                     |       |                                        |       | 0.26 (0.19-0.36)               |       | 0.49 (0.37-0.65)      |       |
| Micropolitan                                               | 2.78 (1.67-4.61)                     |       |                                        |       | 0.83 (0.44-1.58)               |       | 0.46 (0.31-0.67)      |       |
| Medium + small metro                                       | 2.17 (1.36-3.45)                     |       |                                        |       | 0.88 (0.72-1.08)               |       | 1.41 (1.03-1.91)      |       |
| Large metro, fringe                                        | 1.52 (1.01-2.27)                     |       |                                        |       | 0.83 (0.59-1.17)               |       | 0.82 (0.54-1.25)      |       |
| Large metro, central                                       | 1.00 (ref)                           |       |                                        |       | 1.00 (ref)                     |       | 1.00 (ref)            |       |
| <b>Type of home</b>                                        |                                      | 0.031 |                                        |       |                                | 0.031 |                       | 0.011 |
| Mobile home or trailer                                     | 1.86 (1.17-2.97)                     |       |                                        |       | 0.63 (0.38-1.05)               |       | 0.38 (0.21-0.72)      |       |
| Single family – detached                                   | 1.21 (0.84-1.75)                     |       |                                        |       | 0.98 (0.69-1.40)               |       | 0.86 (0.58-1.28)      |       |
| Multi-family housing                                       | 1.00 (ref)                           |       |                                        |       | 1.00 (ref)                     |       | 1.00 (ref)            |       |
| <b>Building year</b>                                       |                                      | 0.006 |                                        |       |                                | <.001 |                       | 0.001 |
| Missing                                                    | 1.06 (0.73-1.52)                     |       |                                        |       | 0.46 (0.32-0.67)               |       | 0.41 (0.25-0.67)      |       |
| Before 1978                                                | 1.76 (1.23-2.52)                     |       |                                        |       | 0.53 (0.43-0.67)               |       | 0.71 (0.49-1.04)      |       |
| 1978-present                                               | 1.00 (ref)                           |       |                                        |       | 1.00 (ref)                     |       | 1.00 (ref)            |       |
| <b>Tenure</b>                                              |                                      | 0.042 |                                        |       |                                |       |                       |       |
| Rented or other arrangement                                | 1.37 (1.01-1.84)                     |       |                                        |       |                                |       |                       |       |
| Owned or being bought                                      | 1.00 (ref)                           |       |                                        |       |                                |       |                       |       |
| <b>Residence time</b>                                      |                                      |       |                                        |       |                                |       |                       | <.001 |
| Up to 2 years                                              |                                      |       |                                        |       |                                |       | 0.69 (0.45-1.05)      |       |
| 3-5 years                                                  |                                      |       |                                        |       |                                |       | 1.21 (0.70-2.09)      |       |
| 6+ years                                                   |                                      |       |                                        |       |                                |       | 1.00 (ref)            |       |
| <b>Number of people in the household</b>                   |                                      |       |                                        |       |                                | 0.050 |                       | 0.048 |
| 1-2                                                        |                                      |       |                                        |       | 0.70 (0.53-0.93)               |       | 2.22 (1.16-4.27)      |       |
| 3-4                                                        |                                      |       |                                        |       | 0.72 (0.50-1.04)               |       | 1.48 (0.70-3.16)      |       |
| 5+                                                         |                                      |       |                                        |       | 1.00 (ref)                     |       | 1.00 (ref)            |       |
| <b>Presence of cat(s)</b>                                  |                                      | <.001 |                                        | <.001 |                                | <.001 |                       | <.001 |
| Yes                                                        | 4.25 (3.31-5.46)                     |       | 2.36 (1.71-3.25)                       |       | 0.10 (0.06-0.16)               |       | 0.13 (0.07-0.22)      |       |
| No                                                         | 1.00 (ref)                           |       | 1.00 (ref)                             |       | 1.00 (ref)                     |       | 1.00 (ref)            |       |
| <b>Presence of dog(s)</b>                                  |                                      | <.001 |                                        |       |                                | <.001 |                       | 0.003 |
| Yes                                                        | 2.33 (1.67-3.26)                     |       |                                        |       | 0.27 (0.18-0.42)               |       | 0.41 (0.23-0.74)      |       |
| No                                                         | 1.00 (ref)                           |       |                                        |       | 1.00 (ref)                     |       | 1.00 (ref)            |       |
| <b>Presence of cockroaches</b>                             |                                      | <.001 |                                        | <.001 |                                | 0.006 |                       | 0.002 |
| Yes                                                        | 2.57 (1.87-3.53)                     |       | 2.14 (1.77-2.59)                       |       | 0.63 (0.45-0.88)               |       | 0.41 (0.23-0.73)      |       |
| No                                                         | 1.00 (ref)                           |       | 1.00 (ref)                             |       | 1.00 (ref)                     |       | 1.00 (ref)            |       |
| <b>Presence of mildew/musty smell</b>                      |                                      |       |                                        | 0.021 |                                |       |                       |       |
| Yes                                                        |                                      |       | 1.43 (1.05-1.93)                       |       |                                |       |                       |       |
| No                                                         |                                      |       | 1.00 (ref)                             |       |                                |       |                       |       |
| <b>Presence of children</b>                                |                                      |       |                                        |       |                                |       |                       | <.001 |
| Child aged 1-5                                             |                                      |       |                                        |       |                                |       | 2.02 (1.22-3.34)      |       |
| Child aged 6-17                                            |                                      |       |                                        |       |                                |       | 0.94 (0.56-1.56)      |       |
| No children                                                |                                      |       |                                        |       |                                |       | 1.00 (ref)            |       |
| <b>Floor covering</b>                                      |                                      |       |                                        | 0.040 |                                | <.001 |                       |       |
| Carpeting or rug                                           |                                      |       | 1.47 (1.02-2.14)                       |       | 0.43 (0.28-0.68)               |       |                       |       |
| Smooth floor                                               |                                      |       | 1.00 (ref)                             |       | 1.00 (ref)                     |       |                       |       |

TABLE E5. Continued\*

| Model predictors – Demographic and Housing Characteristics | Multiple Elevated Exposures (N=6768) |          | Multiple Detectable Exposures (N=6597) |          | No Elevated Exposures (N=6597) |          | Low Exposure (N=6761) |          |
|------------------------------------------------------------|--------------------------------------|----------|----------------------------------------|----------|--------------------------------|----------|-----------------------|----------|
|                                                            | OR (95% CI)                          | <i>P</i> | OR (95% CI)                            | <i>P</i> | OR (95% CI)                    | <i>P</i> | OR (95% CI)           | <i>P</i> |
| <b>Room humidity</b>                                       |                                      |          |                                        |          |                                | <.001    |                       | 0.003    |
| ≥ 70%                                                      |                                      |          |                                        |          | 0.68 (0.46-0.99)               |          | 0.63 (0.32-1.25)      |          |
| 60-69%                                                     |                                      |          |                                        |          | 0.50 (0.38-0.67)               |          | 0.43 (0.26-0.70)      |          |
| 50-59%                                                     |                                      |          |                                        |          | 0.65 (0.52-0.82)               |          | 0.39 (0.20-0.75)      |          |
| 40-49%                                                     |                                      |          |                                        |          | 0.88 (0.65-1.19)               |          | 0.65 (0.35-1.23)      |          |
| < 40%                                                      |                                      |          |                                        |          | 1.00 (ref)                     |          | 1.00 (ref)            |          |

\* Allergen Burden Outcomes: Multiple Elevated Exposures ( $\geq 3$  allergens at elevated levels) and Multiple Detectable Exposures ( $\geq 7$  allergens  $>$ LOD,  $\geq 1$  allergens at elevated levels) represent high allergen burden. No Elevated Exposures (0 allergens at elevated levels) and Low Exposure ( $\leq 2$  allergens  $>$  LOD, 0 allergens at elevated levels) represent low to medium allergen burden. Can f 1, Fel d 1, Der f 1, and Der p 1 levels were elevated if allergen concentration  $>$ 75 percentile; Alt a 1, Bla g 1, Mus m 1 and Rat n 1 levels were elevated if allergen concentration  $>$  90 percentile. The Wald statistic was used to test significance of each variable in the model (*P*-value). All odds ratios (OR) are adjusted for each variable in the final prediction model.

† The metropolitan counties are subdivided based on the population of their metropolitan statistical area (MSA): large (central, fringe), for MSA population of 1 million or more; medium, for MSA population of 250,000–999,999; and small, for MSA population below 250,000. Non-metropolitan counties not defined as micropolitan are considered to be noncore and are thought of as the most rural areas.

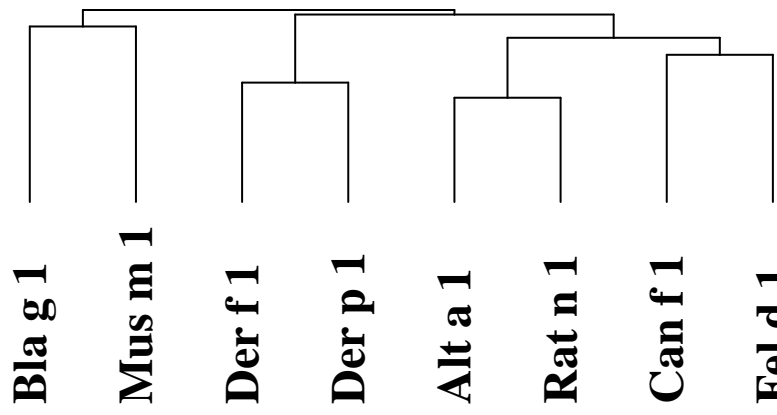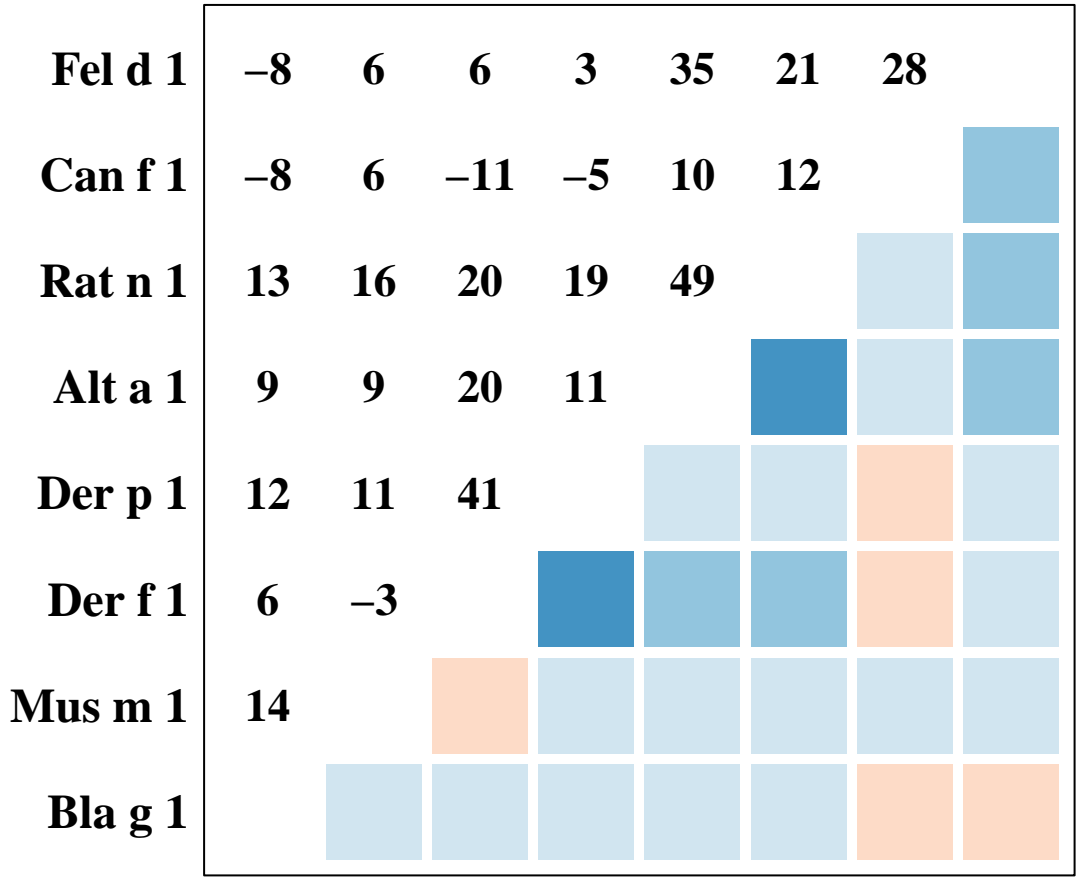

Weighted Pearson Correlation

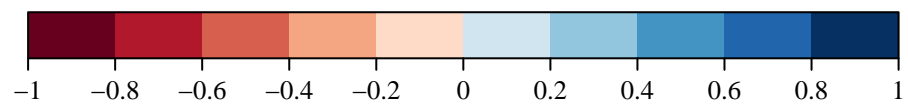



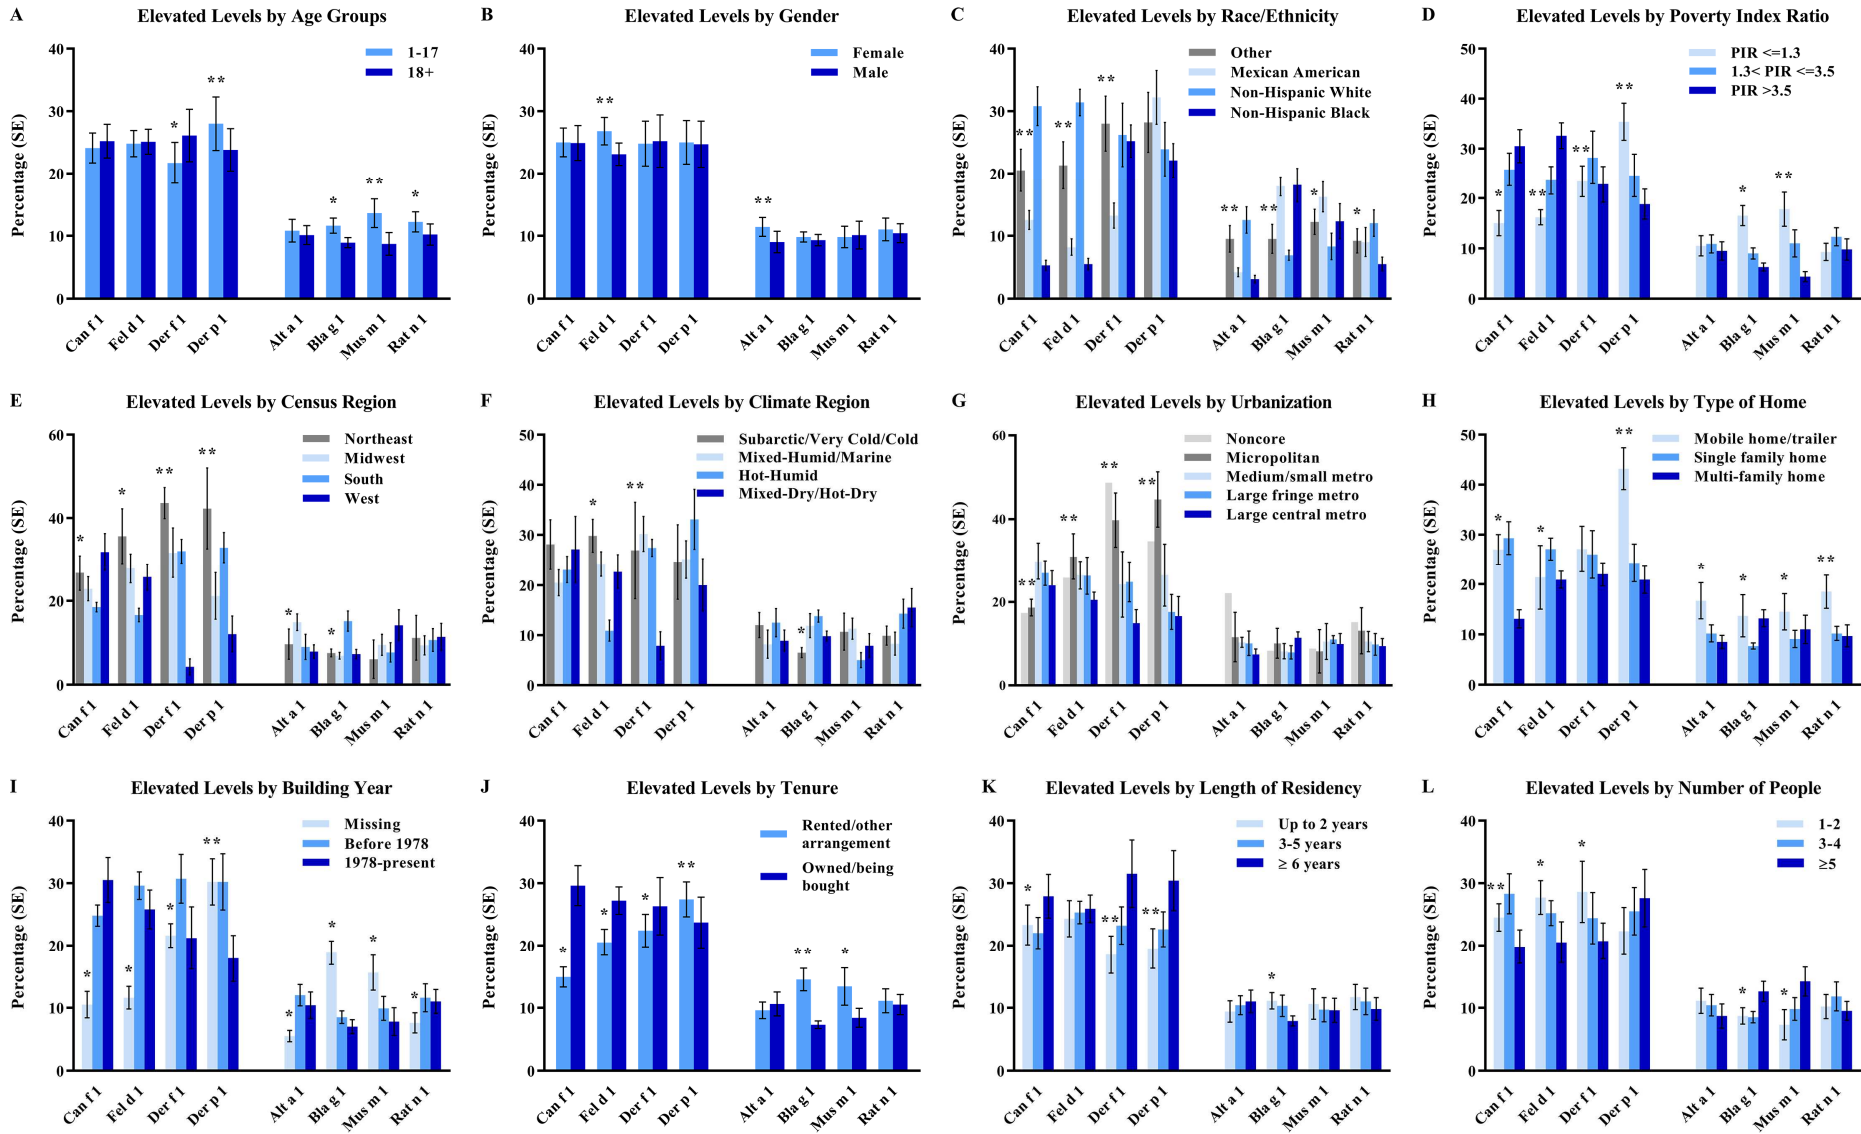

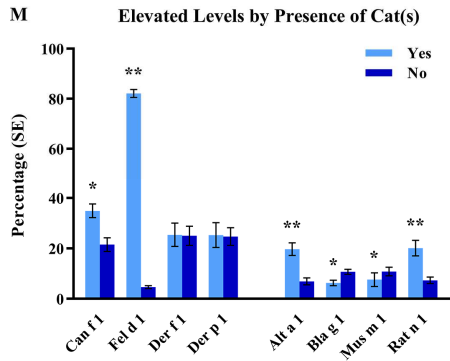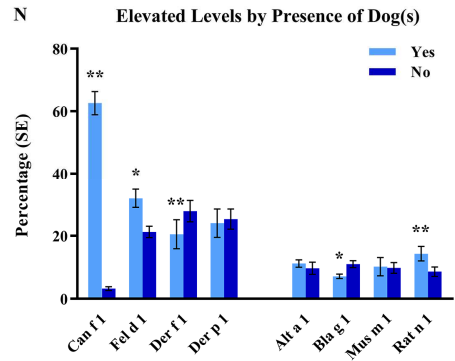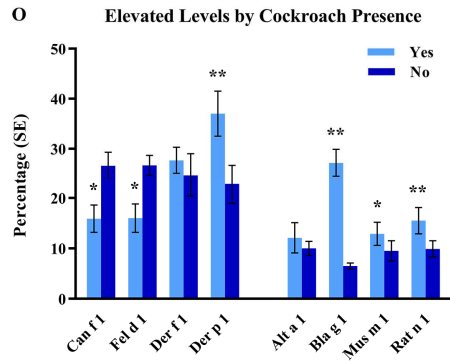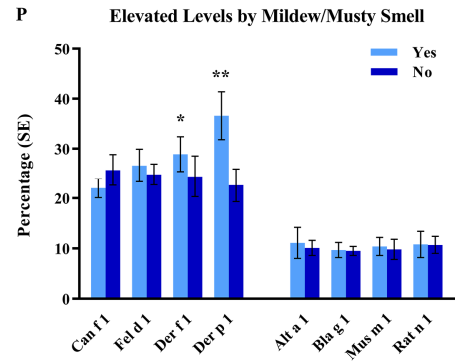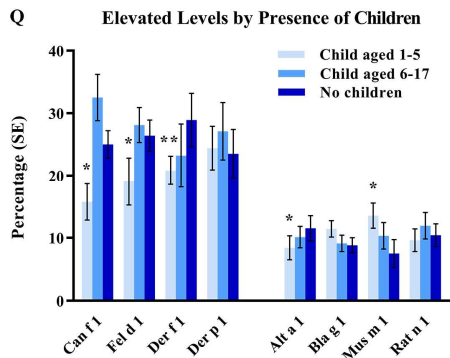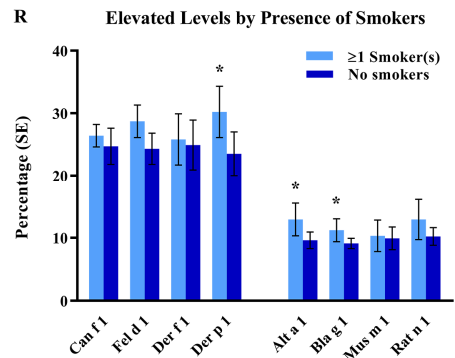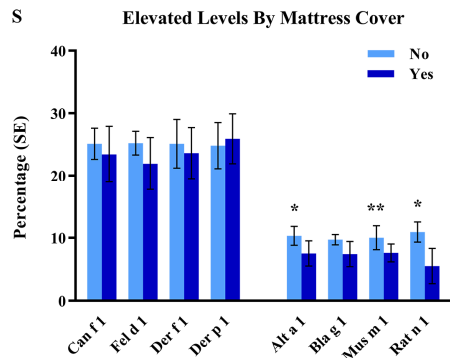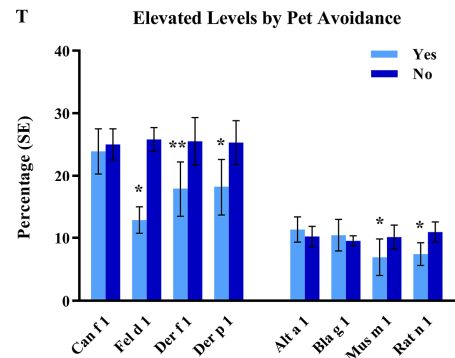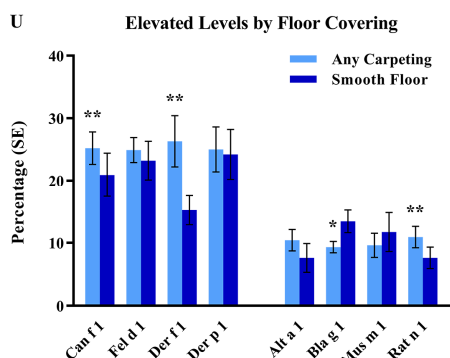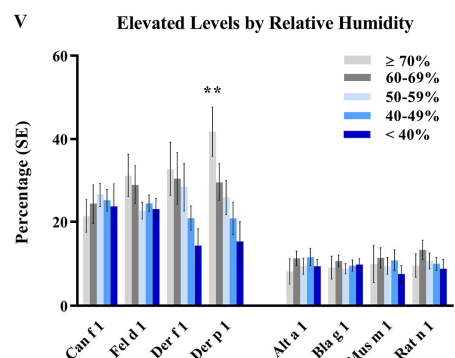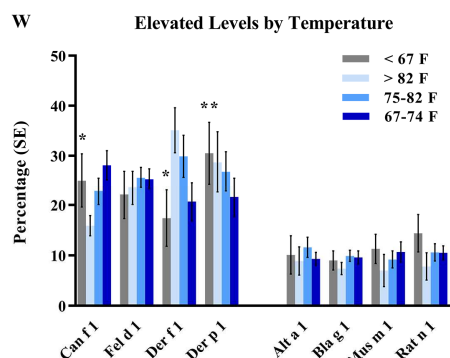

75th Percentile

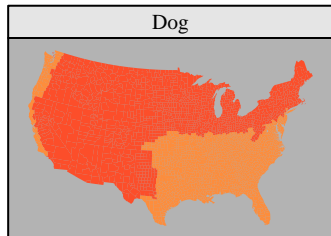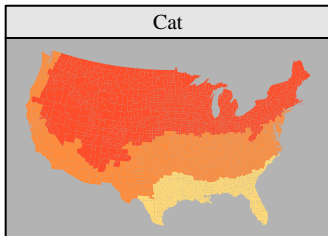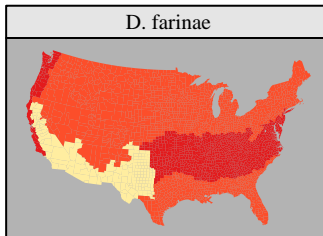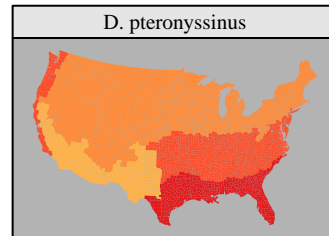

90th Percentile

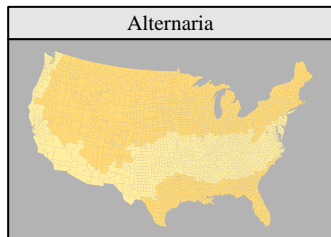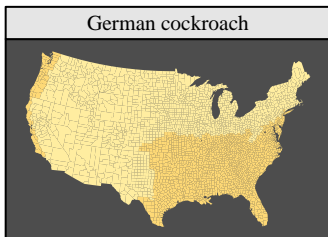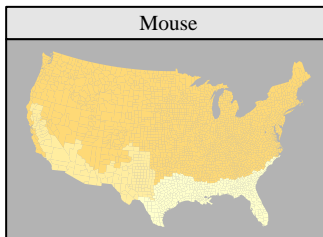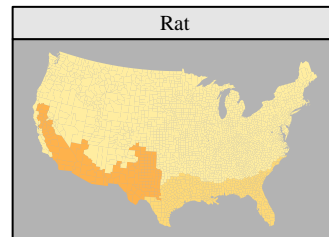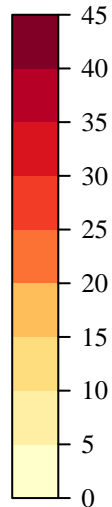

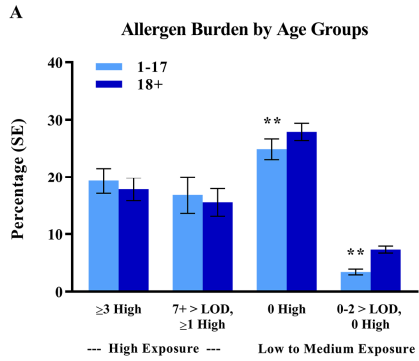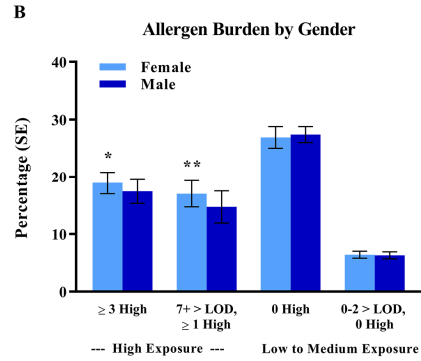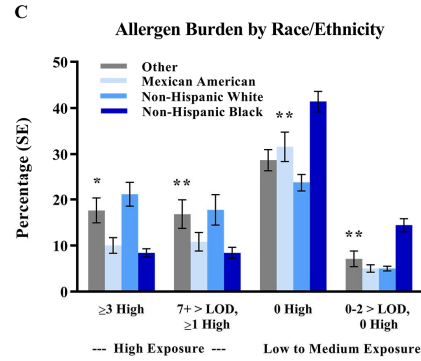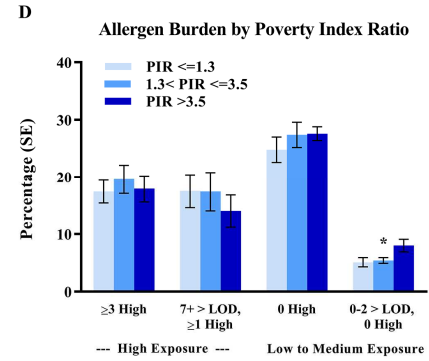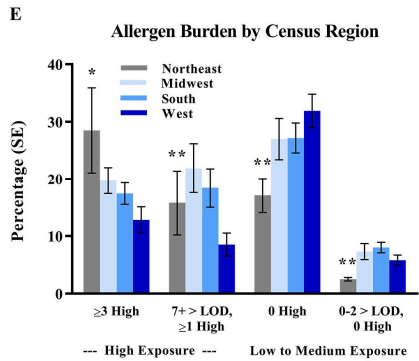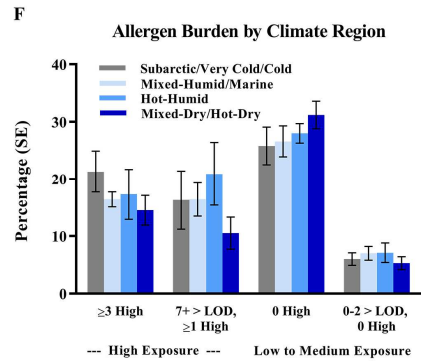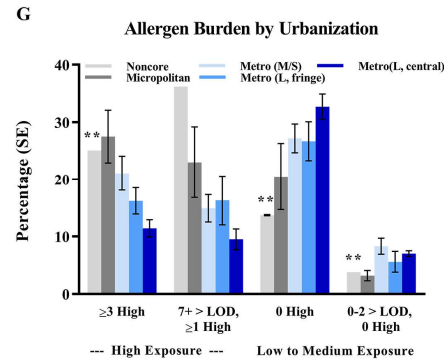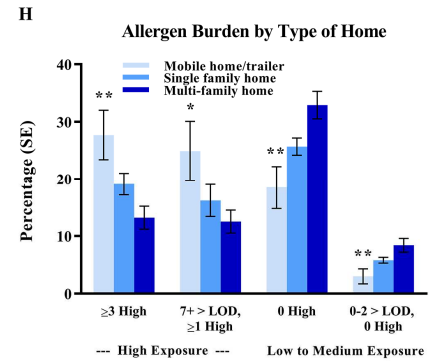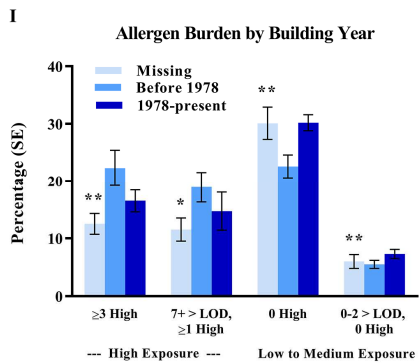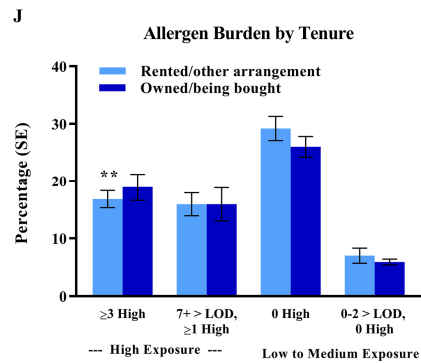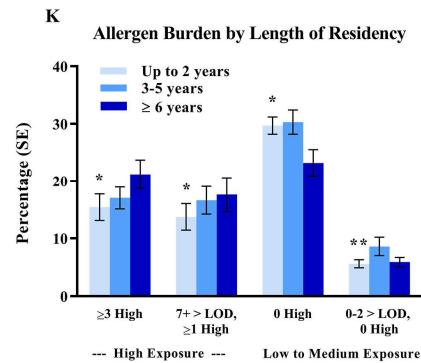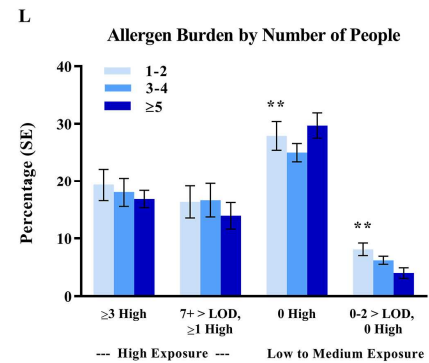

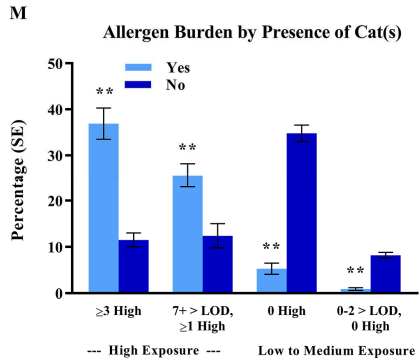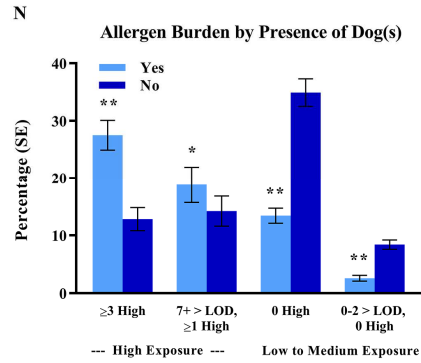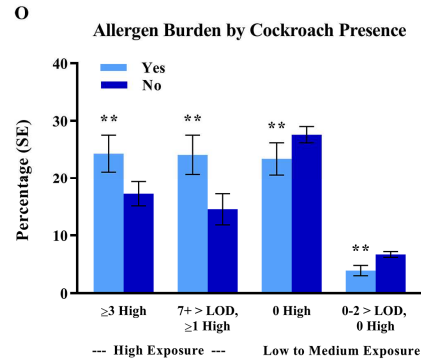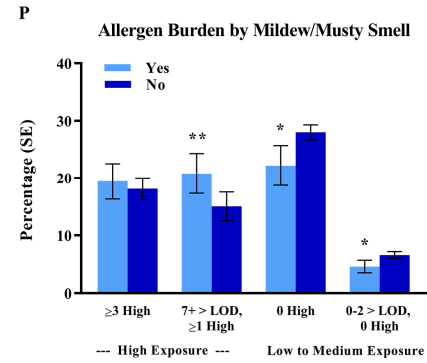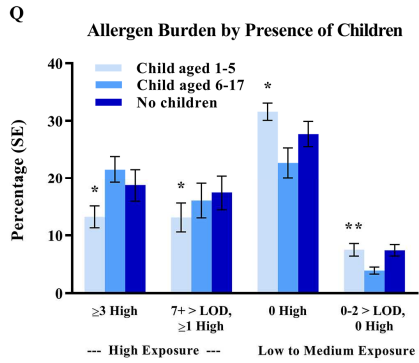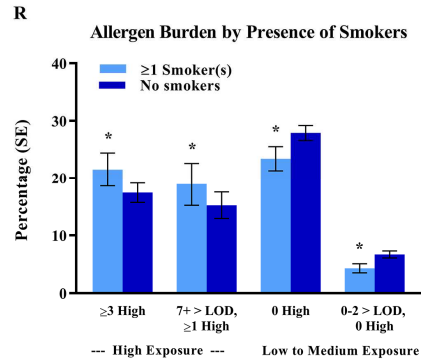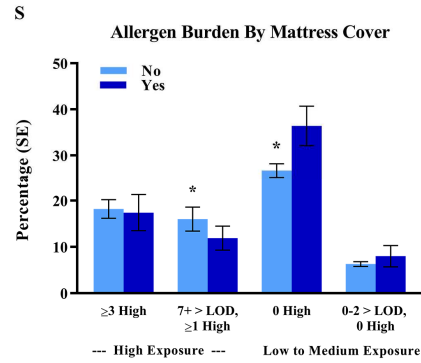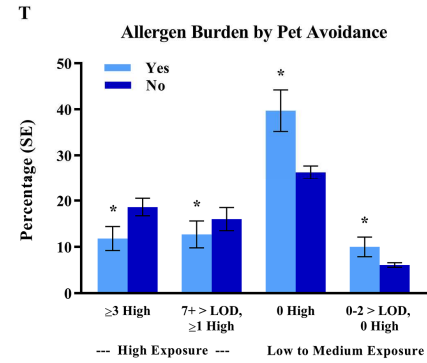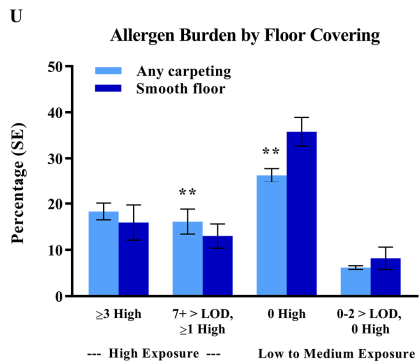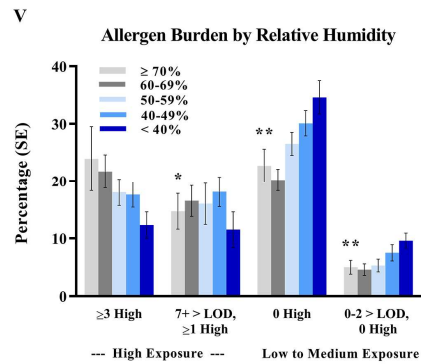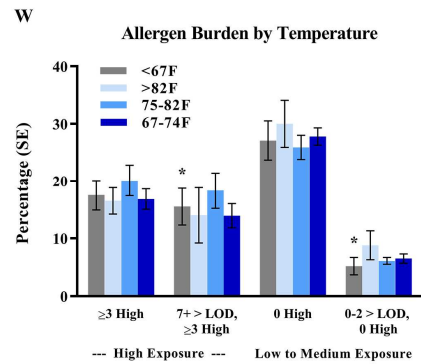

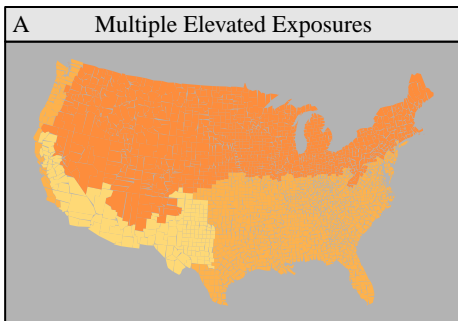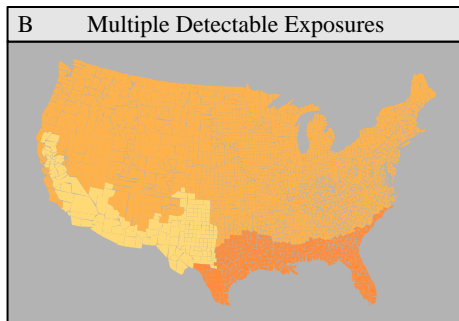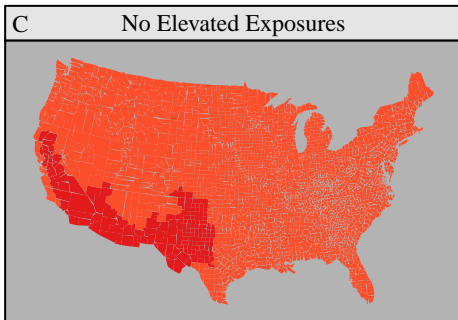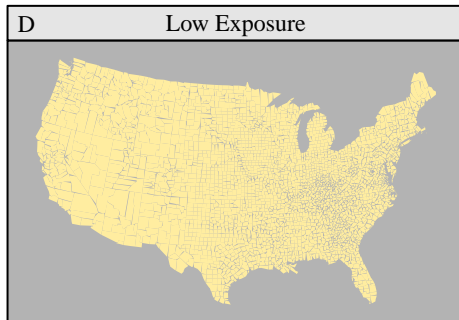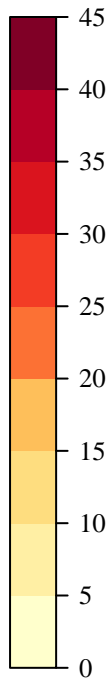

## Online Repository

Bedroom allergen exposures in US households

Päivi M. Salo, PhD<sup>1</sup>, Jesse Wilkerson, BS<sup>2</sup>, Kathryn M. Rose, PhD<sup>2</sup>, Richard D. Cohn, PhD<sup>2</sup>, Agustin Calatroni, MA, MS<sup>3</sup>, Herman E. Mitchell, PhD<sup>3</sup>, Michelle L. Sever, MPH, PhD<sup>3</sup>, Peter J. Gergen, MD, MPH<sup>4</sup>, Peter S. Thorne, PhD<sup>5</sup>, Darryl C. Zeldin, MD<sup>1</sup>

1. Division of Intramural Research, National Institute of Environmental Health Sciences, NIH, Research Triangle Park, NC
2. Social & Scientific Systems, Inc., Durham, NC
3. Rho Federal Systems Division, Inc., Chapel Hill, NC
4. Division of Allergy, Immunology, and Transplantation, National Institute of Allergy and Infectious Diseases, National Institutes of Health (NIH), Bethesda, MD
5. University of Iowa College of Public Health, Iowa City, IA

Corresponding Author:

Darryl C. Zeldin, MD

NIEHS/NIH

111 T.W. Alexander Drive, Room A214

Research Triangle Park, NC 27709

Telephone: (919) 541-1169; Fax: (919) 541-4133

E-mail: zeldin@niehs.nih.gov

## Online Repository - Figure Legends

**Figure E1.** Clustering of allergens in NHANES 2005-2006. The dendrogram (top) employs hierarchical clustering to group similar allergens based on the log-transformed correlation matrix (below).

**Figure E2.** Prevalence of elevated allergen concentrations by participant and housing characteristics (NHANES 2005-2006). Can f 1, Fel d 1, Der f 1, and Der p 1 levels were elevated if allergen concentration >75<sup>th</sup> percentile; Alt a 1, Bla g 1, Mus m 1 and Rat n 1 levels were elevated if allergen concentration > 90<sup>th</sup> percentile. Asterisks indicate whether the variable was included in predictor modeling based upon the relationship observed in bivariate analyses (\*;  $P < 0.25$ ) and remained an independent predictor in the final model (\*\*;  $P < 0.05$ ). The Wald statistic was used to test differences across levels of the characteristic. The reference group in each bar graph group is shown in dark blue (i.e., the rightmost bar).

**Figure E3.** Prevalence of elevated allergen levels by climate region. Can f 1, Fel d 1, Der f 1, and Der p 1 levels were elevated if allergen concentration >75<sup>th</sup> percentile; Alt a 1, Bla g 1, Mus m 1 and Rat n 1 levels were elevated if allergen concentration > 90<sup>th</sup> percentile. The dark background color in the map indicates statistically significant differences ( $P < 0.05$ ) across four climate regions in the United States (Subarctic/Very Cold/Cold; Mixed-Humid/Marine; Hot-Humid; and Mixed-Dry/Hot Dry).

**Figure E4.** Prevalence of allergen burden by participant and housing characteristics (NHANES 2005-2006). Exposure burden was classified as high when 1)  $\geq 3$  allergens exceeded elevated levels (Can f 1, Fel d 1, Der f 1, or Der p 1 concentrations >75<sup>th</sup> percentile; Alt a 1, Bla g 1, Mus m 1 or Rat n 1 concentrations >90<sup>th</sup> percentile), or 2)  $\geq 7$  allergens were above detection limits (>LOD) and  $\geq 1$  allergens exceeded elevated levels. Exposure burden was low to medium when none of the allergens exceeded elevated levels



(irrespective of how many allergens were detected); and low when  $\leq 2$  allergens were detected and none of the allergens exceeded elevated levels. Asterisks indicate whether the variable was included in predictor modeling (\*;  $P < 0.25$ ) and remained an independent predictor in the final model (\*\*;  $P < 0.05$ ). The Wald statistic was used to test differences across levels of the characteristic. The reference group in each bar graph group is shown in dark blue (i.e., the rightmost bar).

**Figure E5.** Prevalence of allergen burden by four climate regions in the United States (Subarctic/Very Cold/Cold; Mixed-Humid/Marine; Hot-Humid; and Mixed-Dry/Hot Dry). Allergen Burden Outcomes: Multiple Elevated Exposures ( $\geq 3$  allergens at elevated levels); Multiple Detectable Exposures ( $\geq 7$  allergens  $> \text{LOD}$ ,  $\geq 1$  allergens at elevated levels); No Elevated Exposures (0 allergens at elevated levels); Low Exposure ( $\leq 2$  allergens  $> \text{LOD}$ , 0 allergens at elevated levels). Can f 1, Fel d 1, Der f 1, and Der p 1 levels were elevated if allergen concentration  $> 75$  percentile; Alt a 1, Bla g 1, Mus m 1 and Rat n 1 levels were elevated if allergen concentration  $> 90$  percentile.
